# Supplementary material
Source: publisher figshare collection journal article supplement (https://acs.figshare.com/ndownloader/files/3894262)
Supplement: Supplementary file 1 [file 3894262]

## Supporting Information

# Interplay Between Dye Coverage and Photovoltaic Performances of Dye-Sensitized Solar Cells Based on Organic Dyes

*Galhenage A. Sewvandi, Changdong Chen, Tomohiko Ishii, Takafumi Kusunose, Yasuhiro Tanaka, Shunsuke Nakanishi, and Qi Feng\**

Department of Advanced Materials Science, Faculty of Engineering, Kagawa University, 2217-20 Hayashi-cho, Takamatsu 761-0396, Japan

### **Corresponding Author**

\*E-mail: [feng@eng.kagawa-u.ac.jp](mailto:feng@eng.kagawa-u.ac.jp).

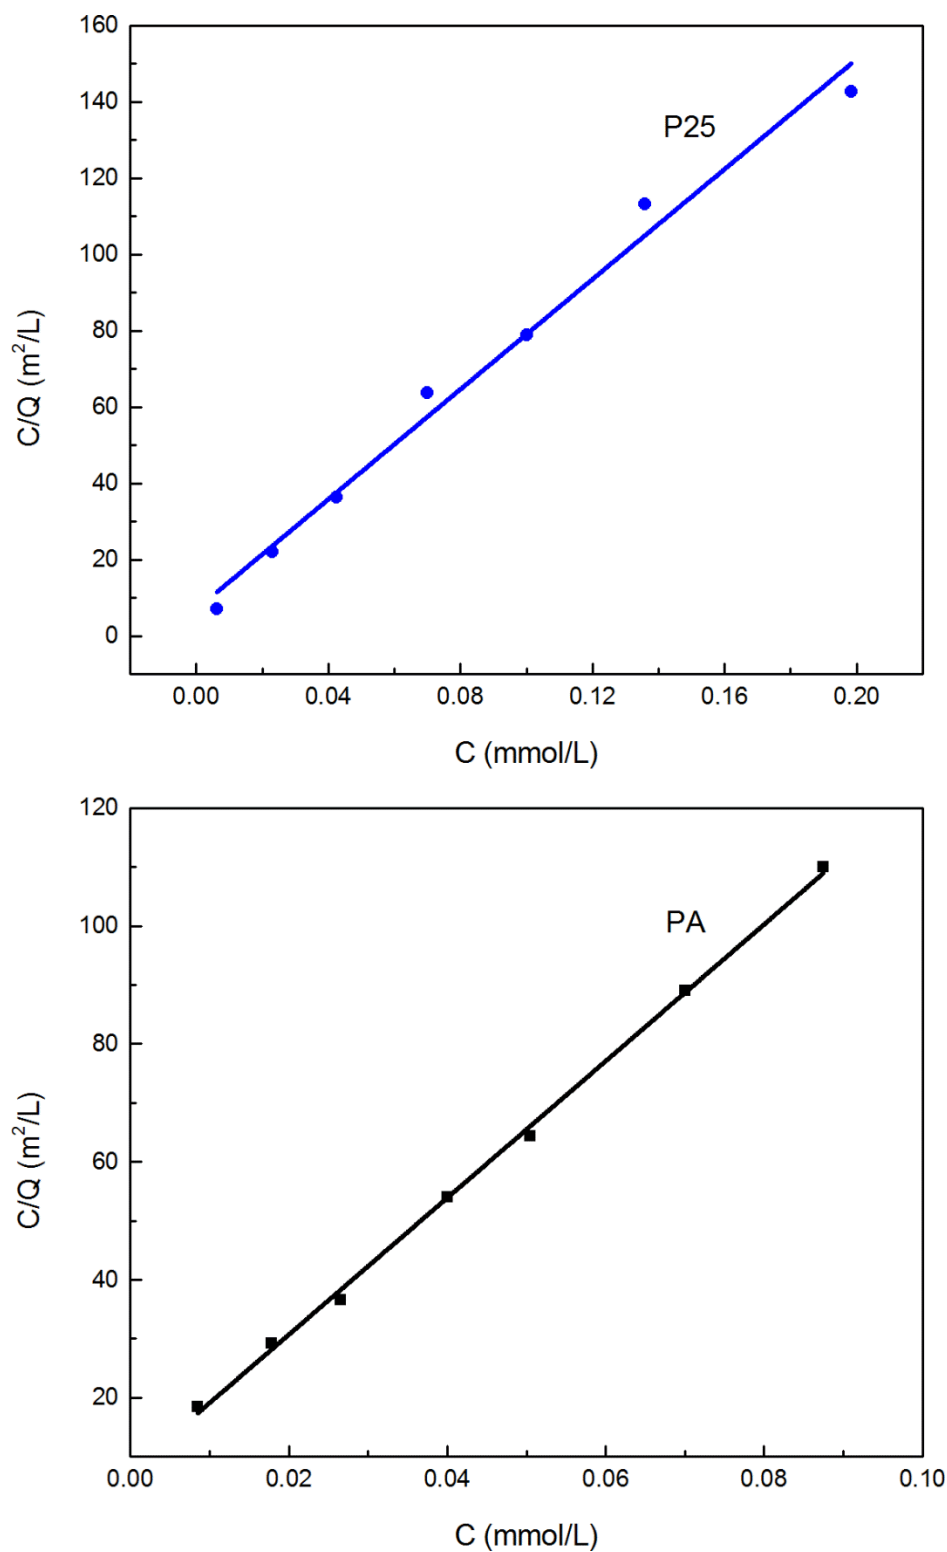

**Figure S1.** Linearized absorption isotherms for MK-2 dye on P25 and PA-TiO<sub>2</sub> nanoparticles.

The least square values ( $R^2$ ) are equal to 0.987 for P25 and 0.998 for PA.

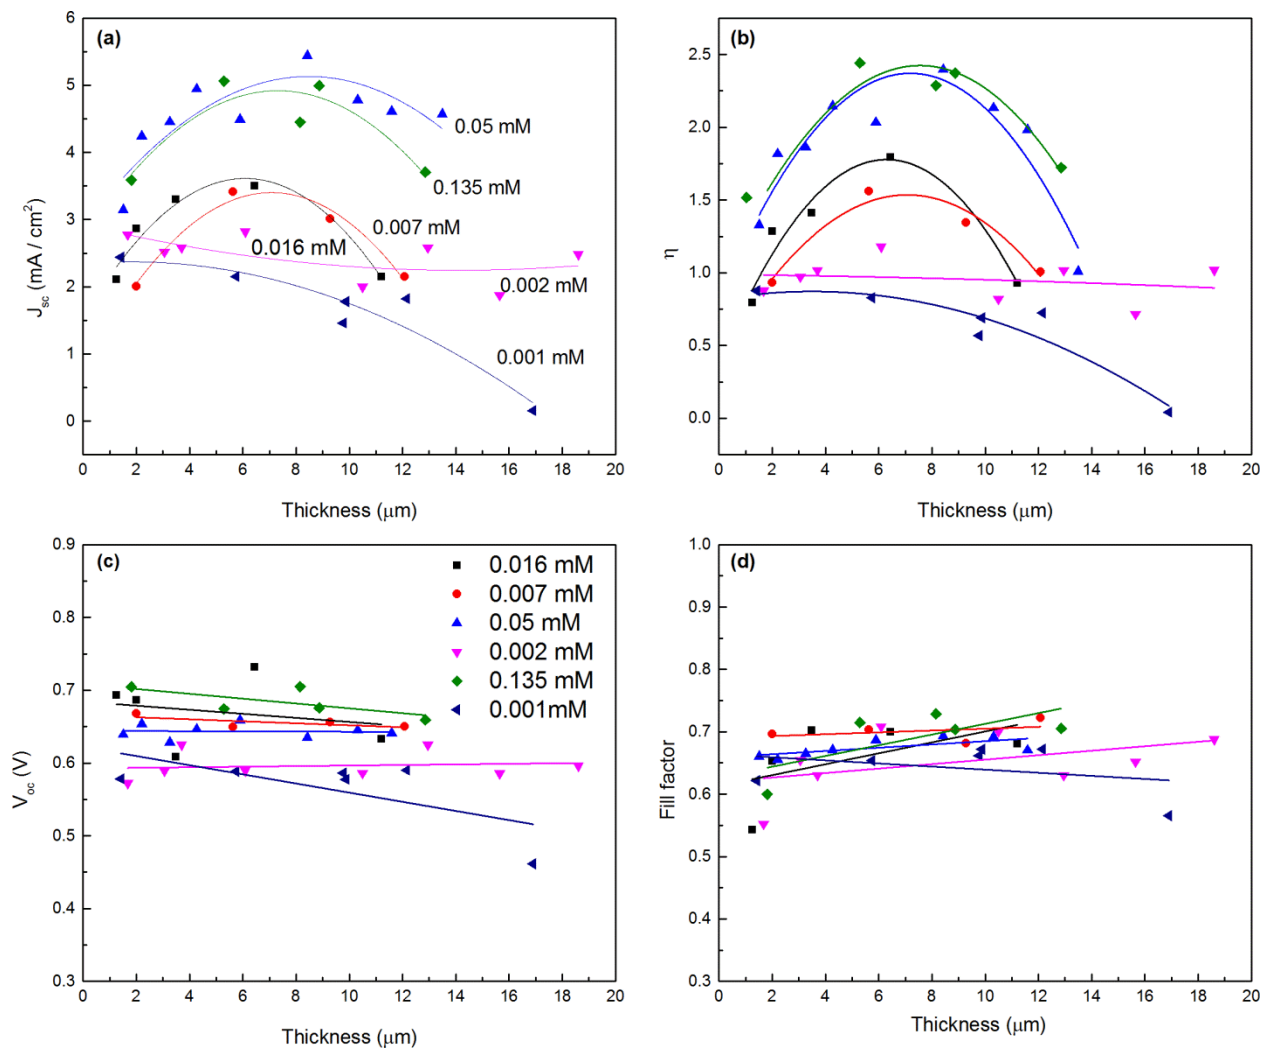

**Figure S2.** Photovoltaic-characteristics variation with P25-TiO<sub>2</sub> film thickness: (a)  $J_{sc}$ ; (b)  $\eta$ ; (c)  $V_{oc}$ ; (d) fill factor.

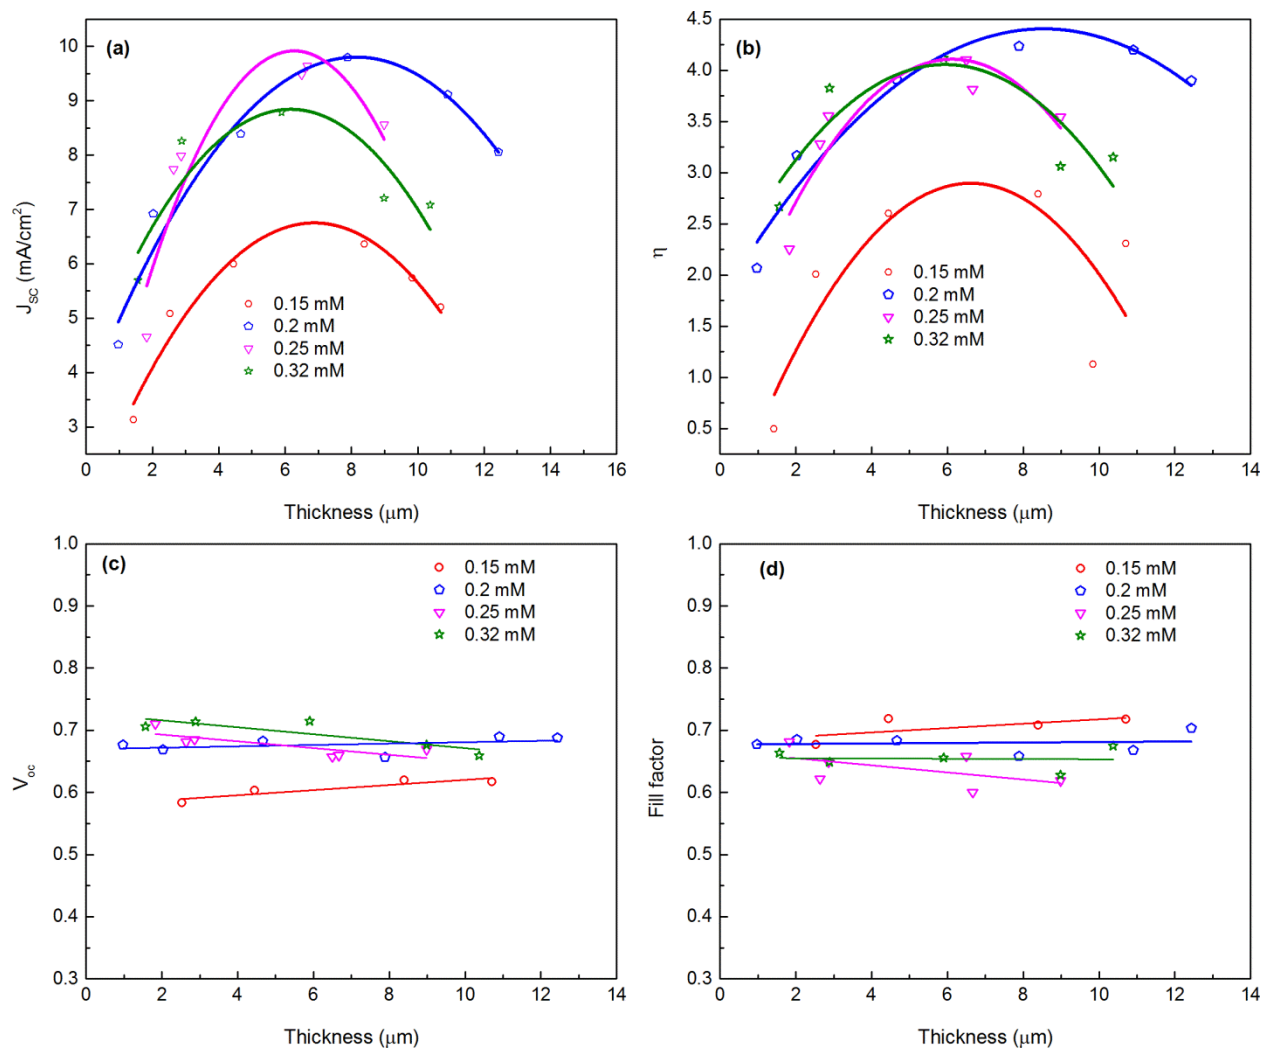

**Figure S3.** Photovoltaic-characteristics variation with PA-TiO<sub>2</sub> film thickness: (a)  $J_{sc}$ ; (b)  $\eta$ ; (c)  $V_{oc}$ ; (d) fill factor.

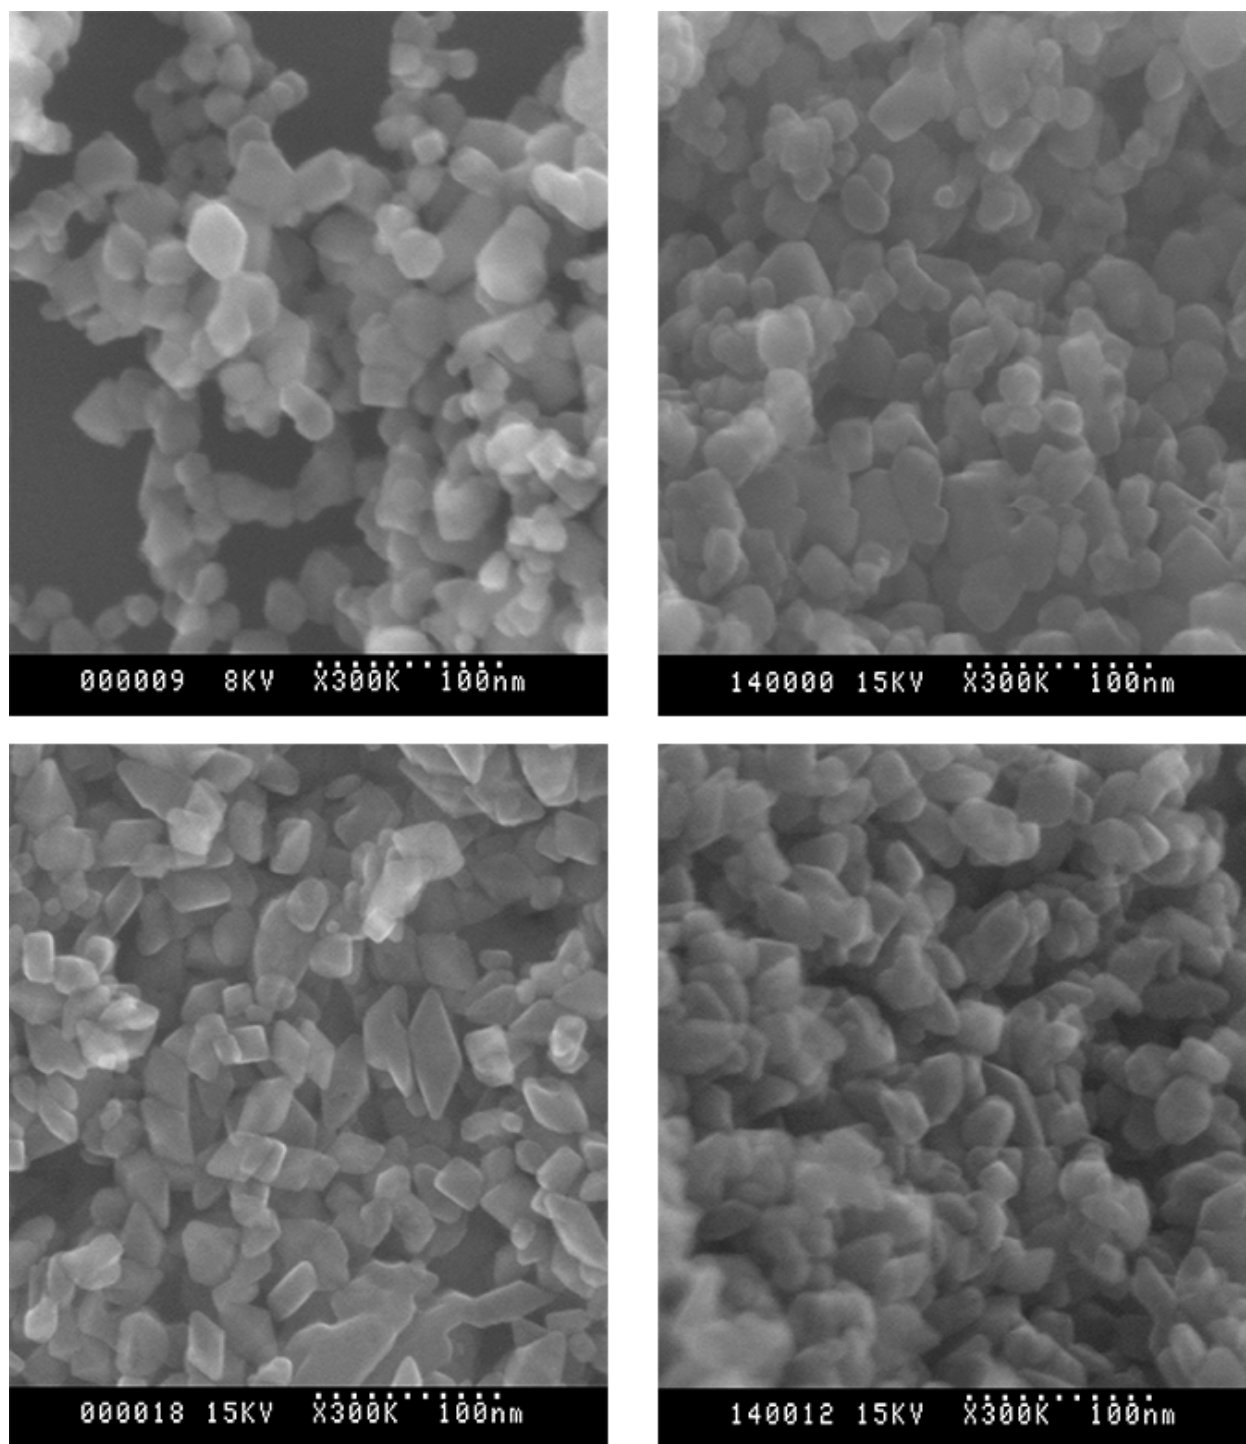

**Figure S4.** FE-SEM images: (a) P25 nanoparticles; (b) cross-sectional view of heat-treated P25 film; (c) PA nanoparticles; (d) cross-sectional view of heat-treated PA film.

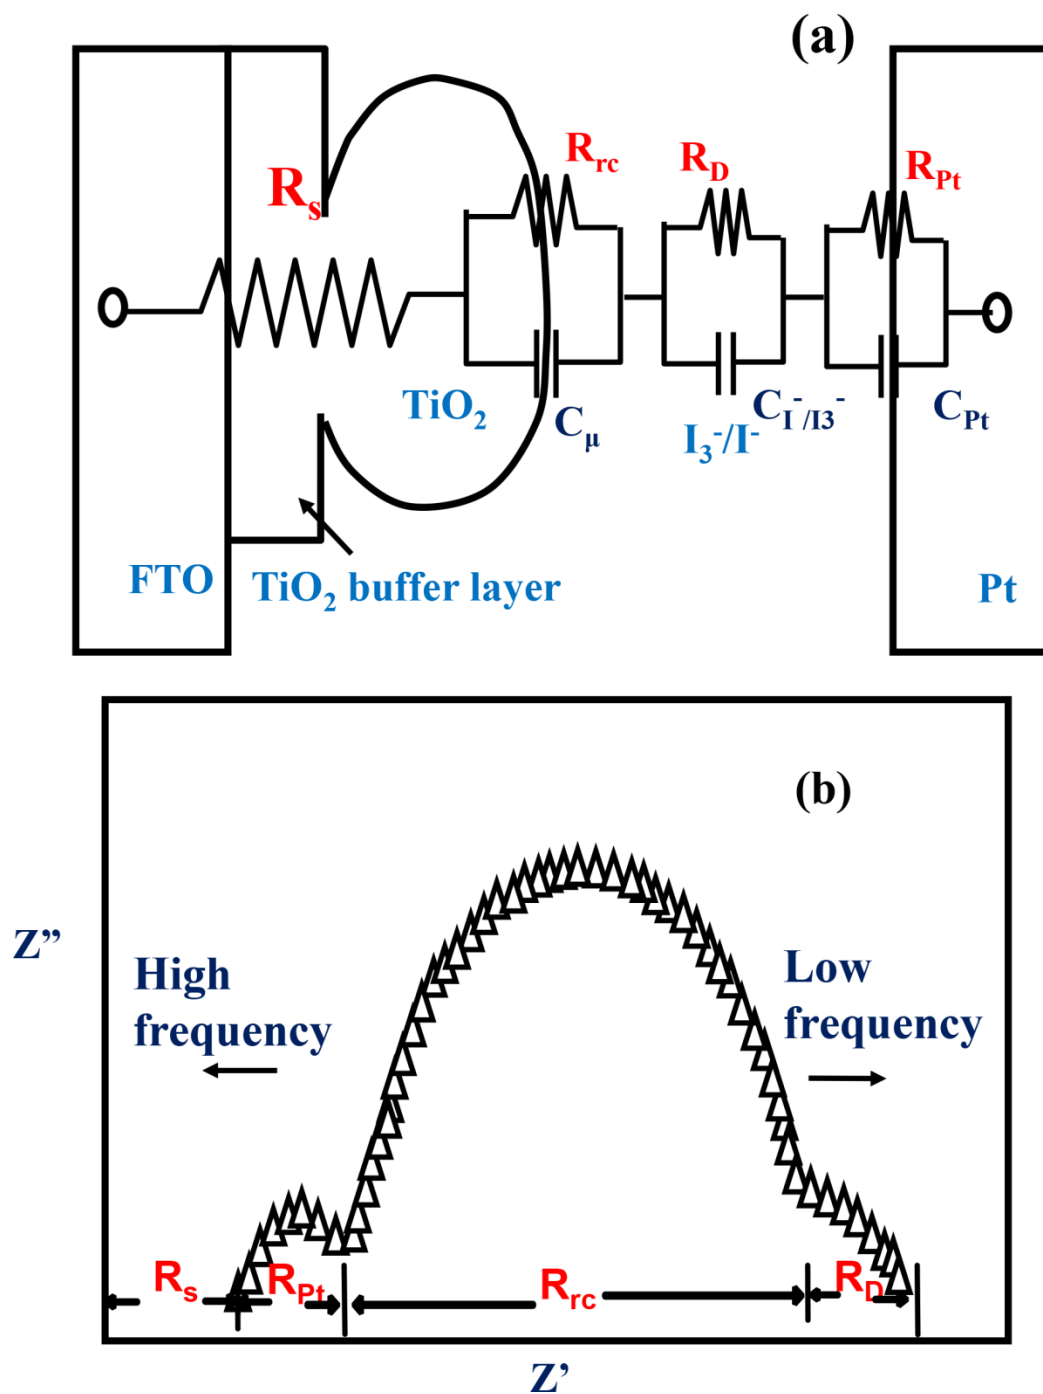

**Figure S5.** Equivalent circuit diagram (a) and model (b) used to fit the impedance data.

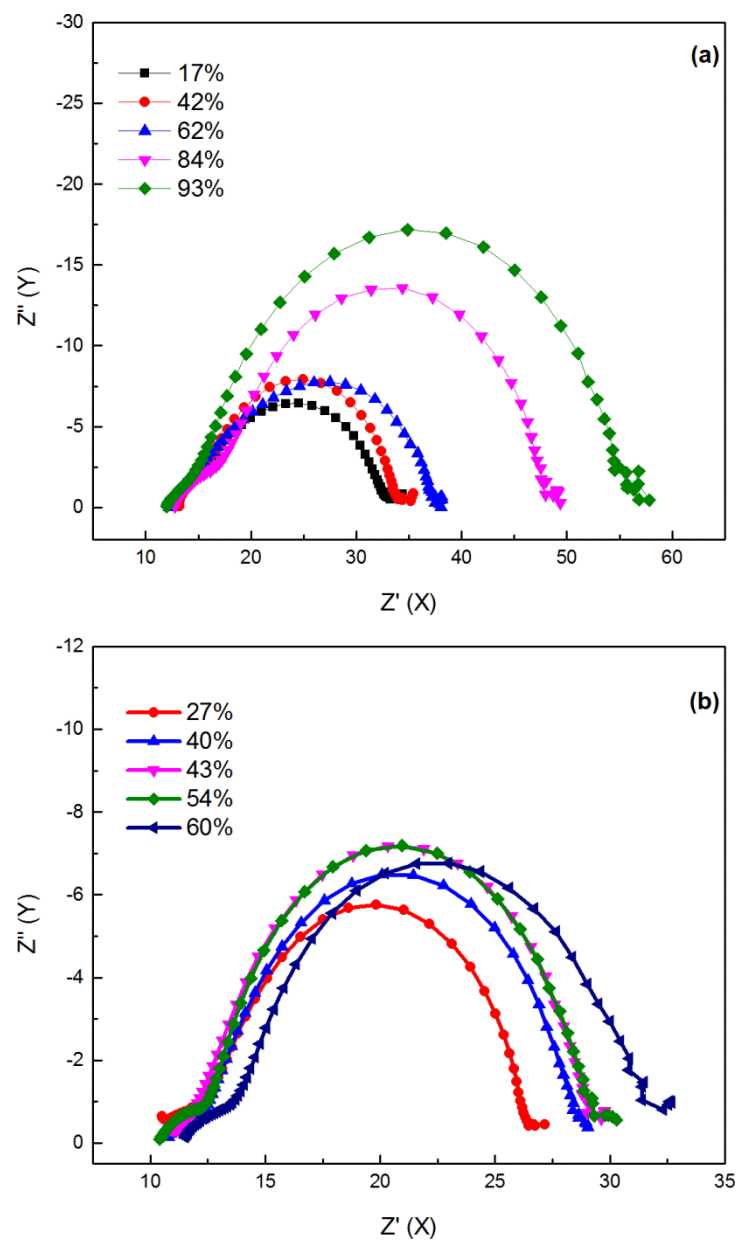

**Figure S6.** Nyquist plots of DSSCs fabricated using P25 and PA  $\text{TiO}_2$  electrodes with different dye coverage:(a) P25 and (b) PA-  $\text{TiO}_2$ .

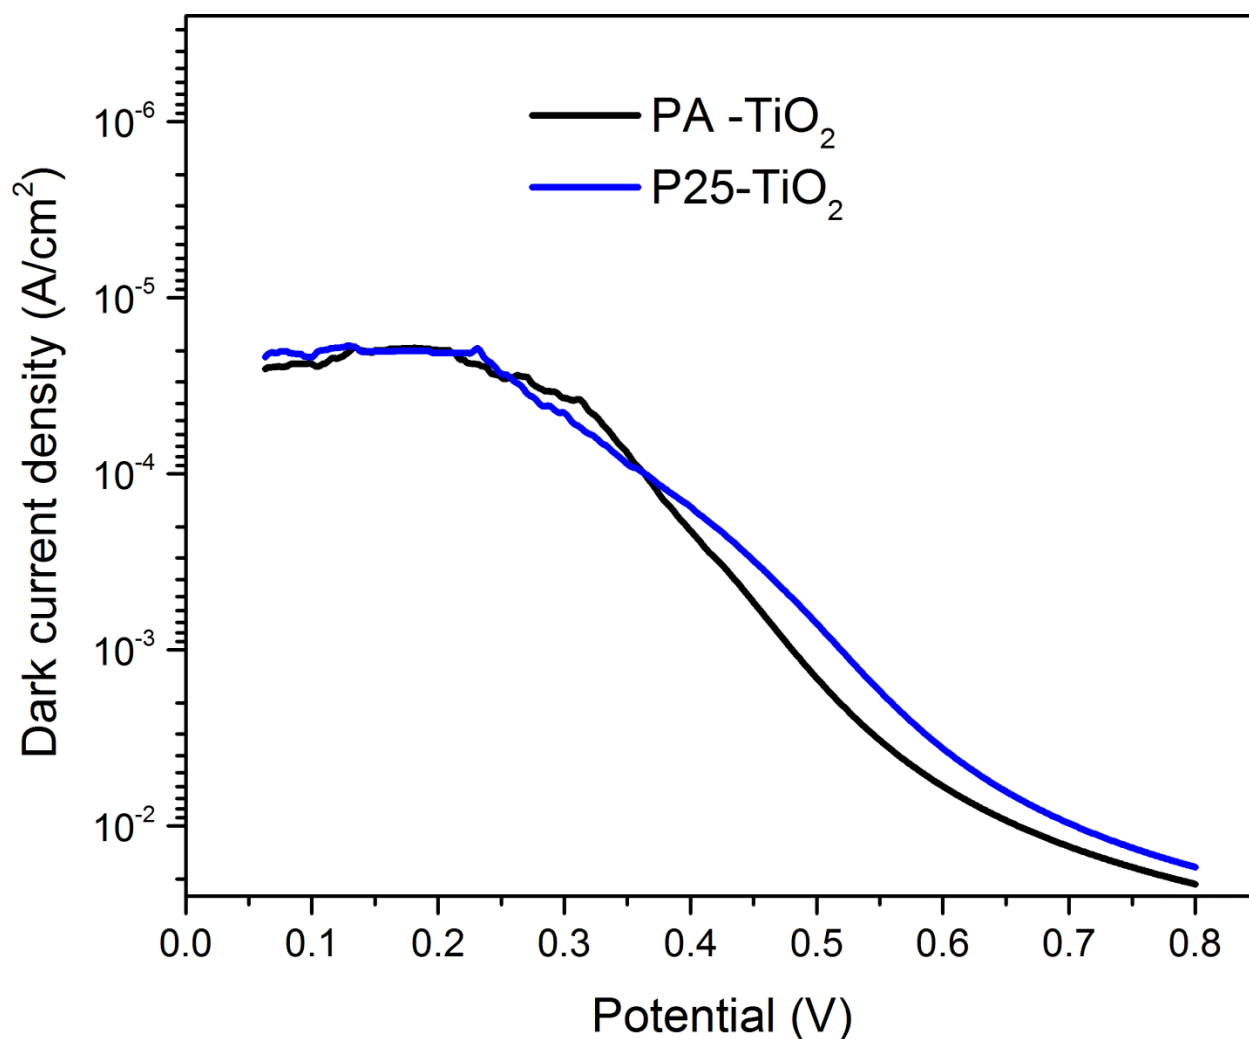

**Figure S7.** Dark current density in log scale Vs bias potential of the P25 and PA cells.

In the low-forward-bias region both cells exhibit almost similar dark-current values showing a similar blocking effects of the cells in the TiO<sub>2</sub> buffer layer/ electrolyte interface. In the high forward bias region ( $\sim 0.4$  V onward), dark-current values of P25-TiO<sub>2</sub> is lower than PA-TiO<sub>2</sub>. It can be attributed to its high  $R_{rc}$  value due to high TiO<sub>2</sub> surface coverage.
